# Supplementary material for: CRISPRing KRAS: A Winding Road with a Bright Future in Basic and Translational Cancer Research
Source: MDPI journal article supplement (doi:10.3390/cancers16020460), 2024-01-22
Supplement: s1 [file s1]

**Table S1.** KRAS mouse modeling by the CRISPR/Cas system (in chronological order).

| Tumor type                           | Targeted gene                                                      | Delivery        | Methods                                                              | Publication year | Reference |
|--------------------------------------|--------------------------------------------------------------------|-----------------|----------------------------------------------------------------------|------------------|-----------|
| Lung adenocarcinoma                  | Rosa26, Myd88, A20, Kras <sup>G12D</sup> , p53, LKB1               | AAV             | Intranasal/intratracheal                                             | 2014             | [96]      |
| Pancreatic cancer                    | LKB1                                                               | Lentivirus      | Retrograde ductal injections                                         | 2015             | [97]      |
| Pancreatic cancer                    | Brac2                                                              | Electroporation | Laparotomy                                                           | 2016             | [25]      |
| Colorectal cancer                    | Apc, Trp53                                                         | Lentivirus      | Mucosal injection                                                    | 2017             | [98]      |
| Gallbladder cancer                   | Cr8, p53, PTEN                                                     | Retroviral      | Subcutaneous /orthotopic transplantation of organoids                | 2019             | [99]      |
| Pancreatic cancer                    | Kras, Trp53, LKB1, Arid1a                                          | AAV             | Surgical procedure and direct injection                              | 2019             | [100]     |
| Colorectal cancer/pancreatic cancer/ | Kras <sup>G12R</sup> , Kras <sup>G13D</sup> , Kras <sup>G12C</sup> | Nucleofection   | Blastocyst injection                                                 | 2020             | [101]     |
| Gall bladder cancer                  | Kras <sup>G12D</sup> , Trp53                                       | Lentivirus      | Implantation of organoid-derived tumor bud                           | 2021             | [102]     |
| Pancreatic cancer                    | Kras                                                               | Lentivirus      | Orthotopic injection                                                 | 2021             | [103]     |
| Non-small cell lung cancer           | Trp53, Kras <sup>G12D</sup>                                        | AAV             | Intratracheal                                                        | 2021             | [104]     |
| Mammary tumor                        | Kras <sup>G12D</sup> , Pik3ca                                      | AAV             | Intraductally into mammary glands                                    | 2023             | [105]     |
| Lung cancer /pancreatic cancer       | Rosa26 <sup>PE2</sup> , Trp53                                      | Lentivirus      | Intratracheally transduced/retrograde pancreatic duct viral delivery | 2023             | [106]     |

AAV, Adeno-associated virus;
